# Supplementary material
Source: publisher figshare collection journal article supplement (https://acs.figshare.com/ndownloader/files/5174887)
Supplement: Supplementary file 1 [file 5174887]

**Polybrominated Diphenyl Ethers in the Sediments of the Great Lakes. 1 - Lake Superior  
(Song, et al.)**

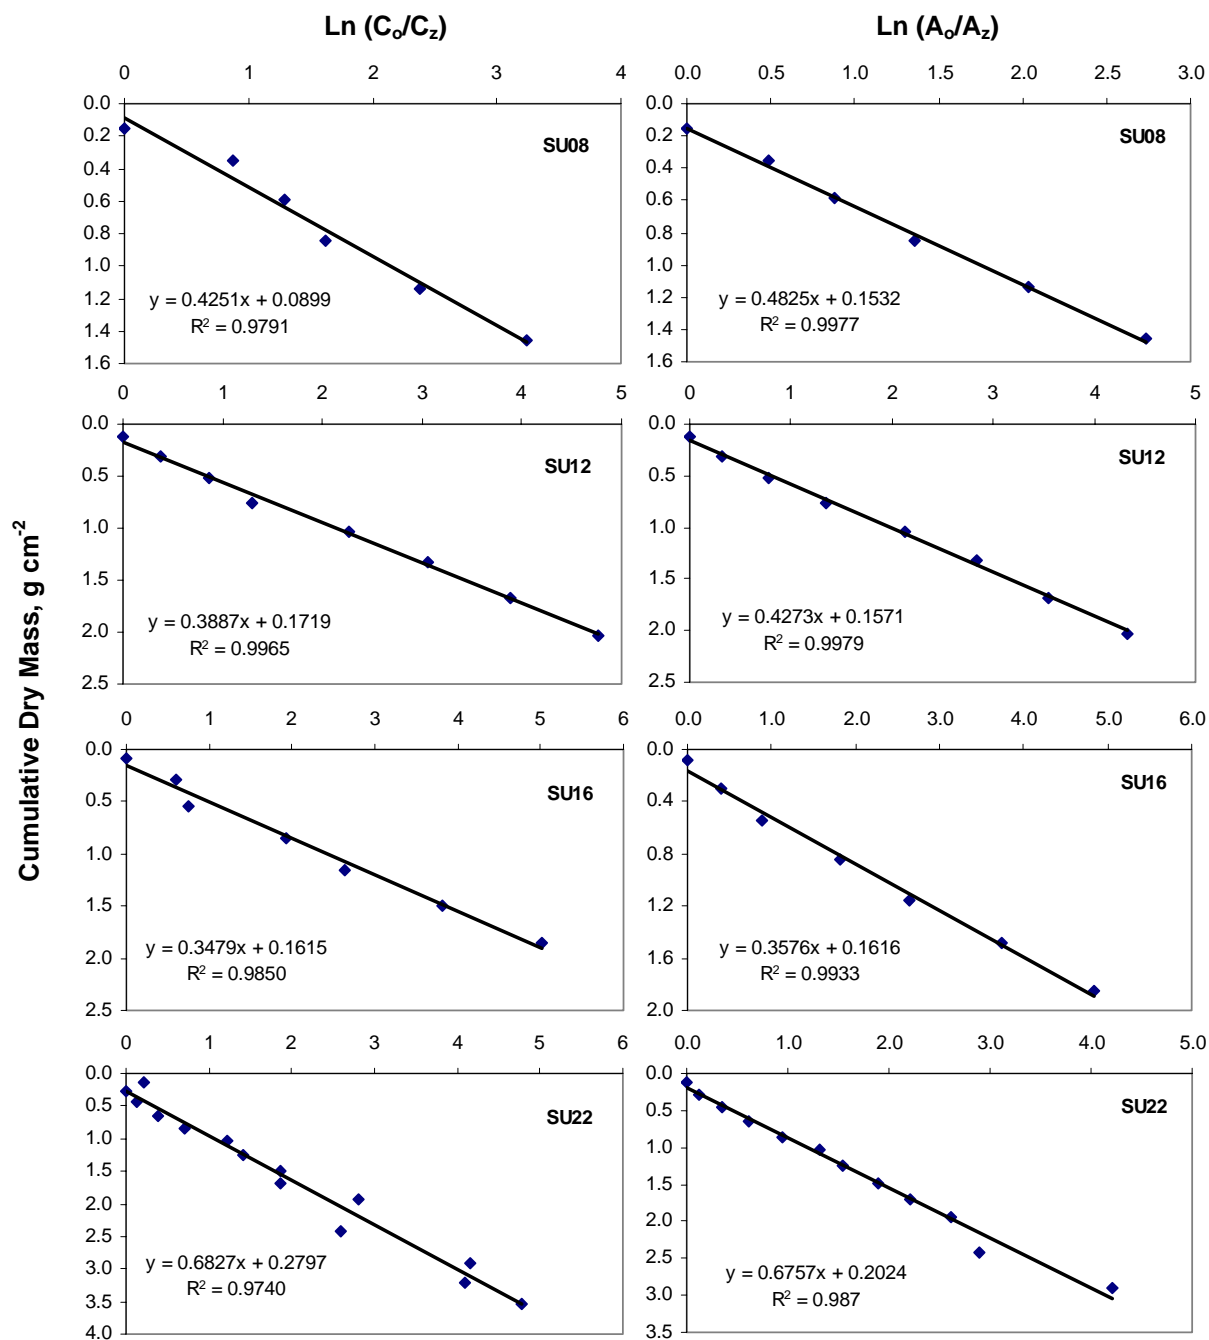

**FIGURE S1. Activity of <sup>210</sup>Pb vs. Cumulative Dry Mass of Sediment.**

In Figure S1:

$C_z$  = unsupported  $^{210}\text{Pb}$  activity ( $\text{dpm g}^{-1}$ ) in the core segment at depth  $z$ ,

$C_o$  = unsupported  $^{210}\text{Pb}$  activity ( $\text{dpm g}^{-1}$ ) in the surface segment,

$A_z$  = the integrated unsupported  $^{210}\text{Pb}$  activity ( $\text{dpm cm}^{-2}$ ) in the core below depth  $z$ ,

$A_o$  = the integrated unsupported  $^{210}\text{Pb}$  activity ( $\text{dpm cm}^{-2}$ ) in the entire core.

The sedimentation rate is calculated using the equation

$$\text{Sedimentation Rate (g cm}^{-2} \text{ yr}^{-1}) = \text{Slope} \times 0.693 / 22.26$$

where 22.26 (yr) is the half life of  $^{210}\text{Pb}$ .
